# Supplementary material for: Patient-Identified Treatment Goals for Psoriatic Disease: Results From a US Patient Survey
Source: PubMed Central journal article supplement — J Psoriasis Psoriatic Arthritis. 2024 Oct 14;10(1):11–21. doi: 10.1177/24755303241290495 (PMC11559564; doi:10.1177/24755303241290495), 2024-10-14
Supplement: sj-pdf-1-jps-10.1177_24755303241290495.pdf [file sj-pdf-1-jps-10.1177_24755303241290495.pdf]

## Supplement

**Figure S1. Preferences and outcomes by type of health care provider among patients with psoriasis**

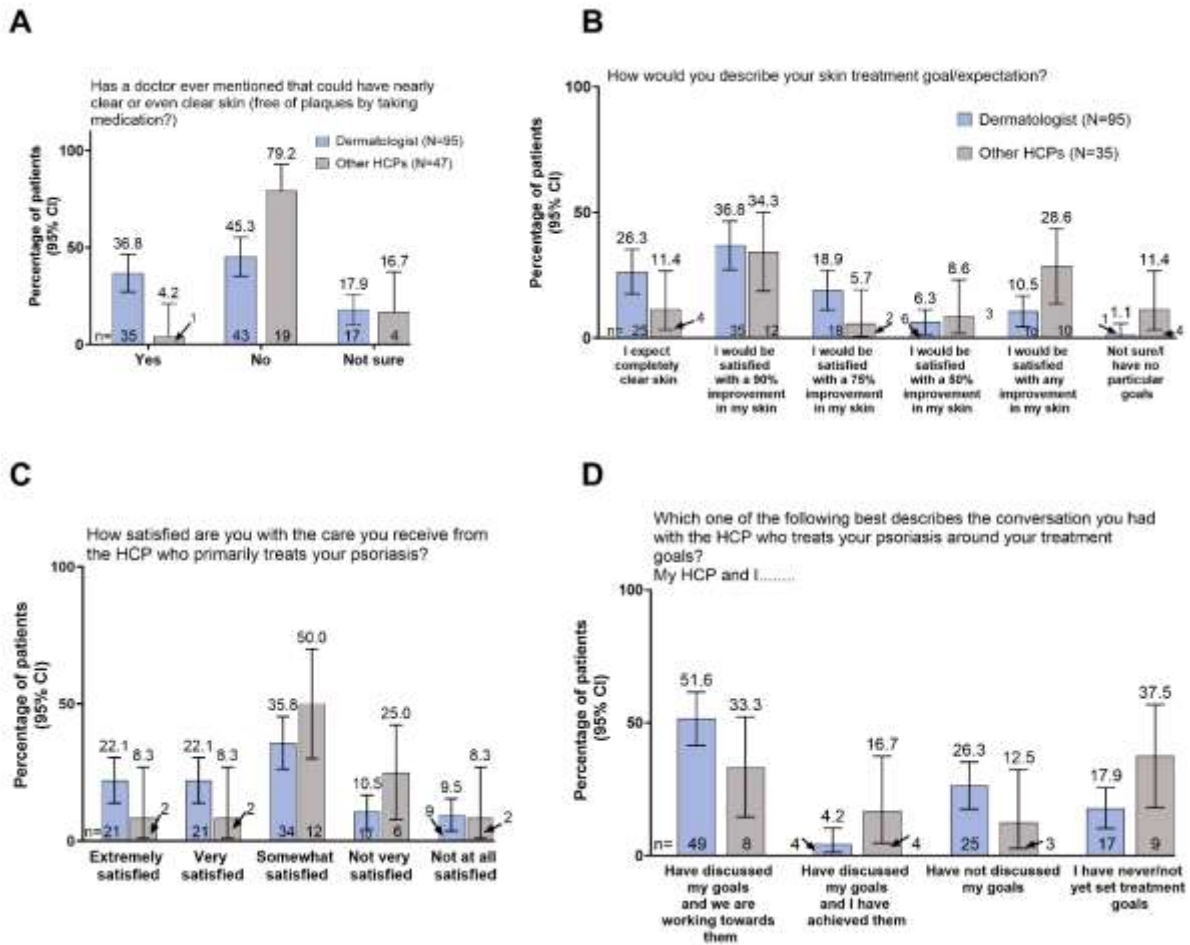

n= number of responses; N=number of respondents; PsA, psoriatic arthritis; PsO, psoriasis

**Figure S2. Preferences and outcomes by type of health care provider among patients with psoriatic arthritis**

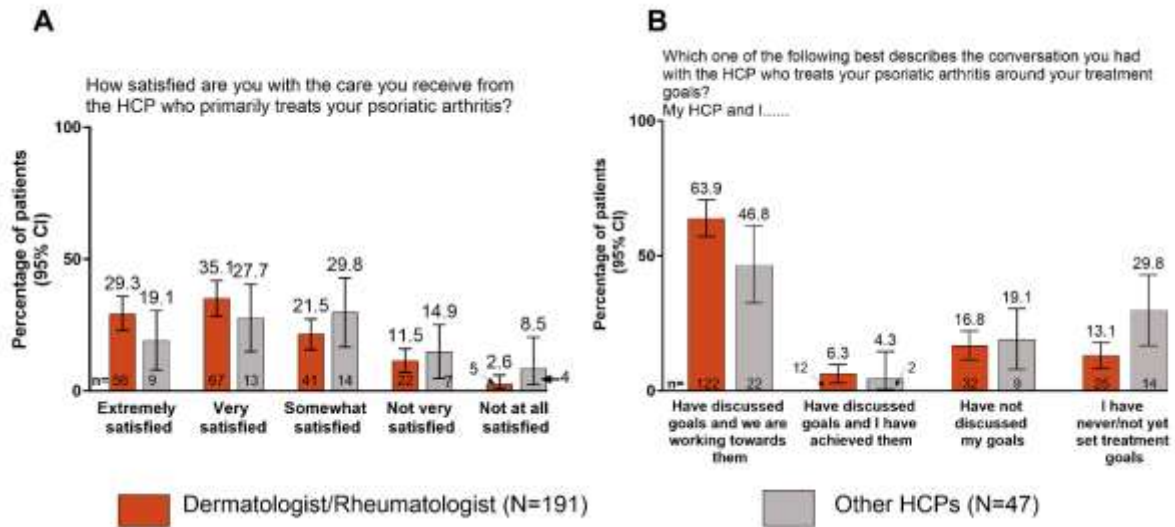

n= number of responses; N=number of respondents; PsA, psoriatic arthritis; PsO, psoriasis
